# Supplementary material
Source: PubMed Central journal article supplement (PMC3051233)
Supplement: supp_tpc.109.072769_Plant_Cell_Supplemental_Data.pdf [file supp_tpc.109.072769_Plant_Cell_Supplemental_Data.pdf]

## Supplemental Figures

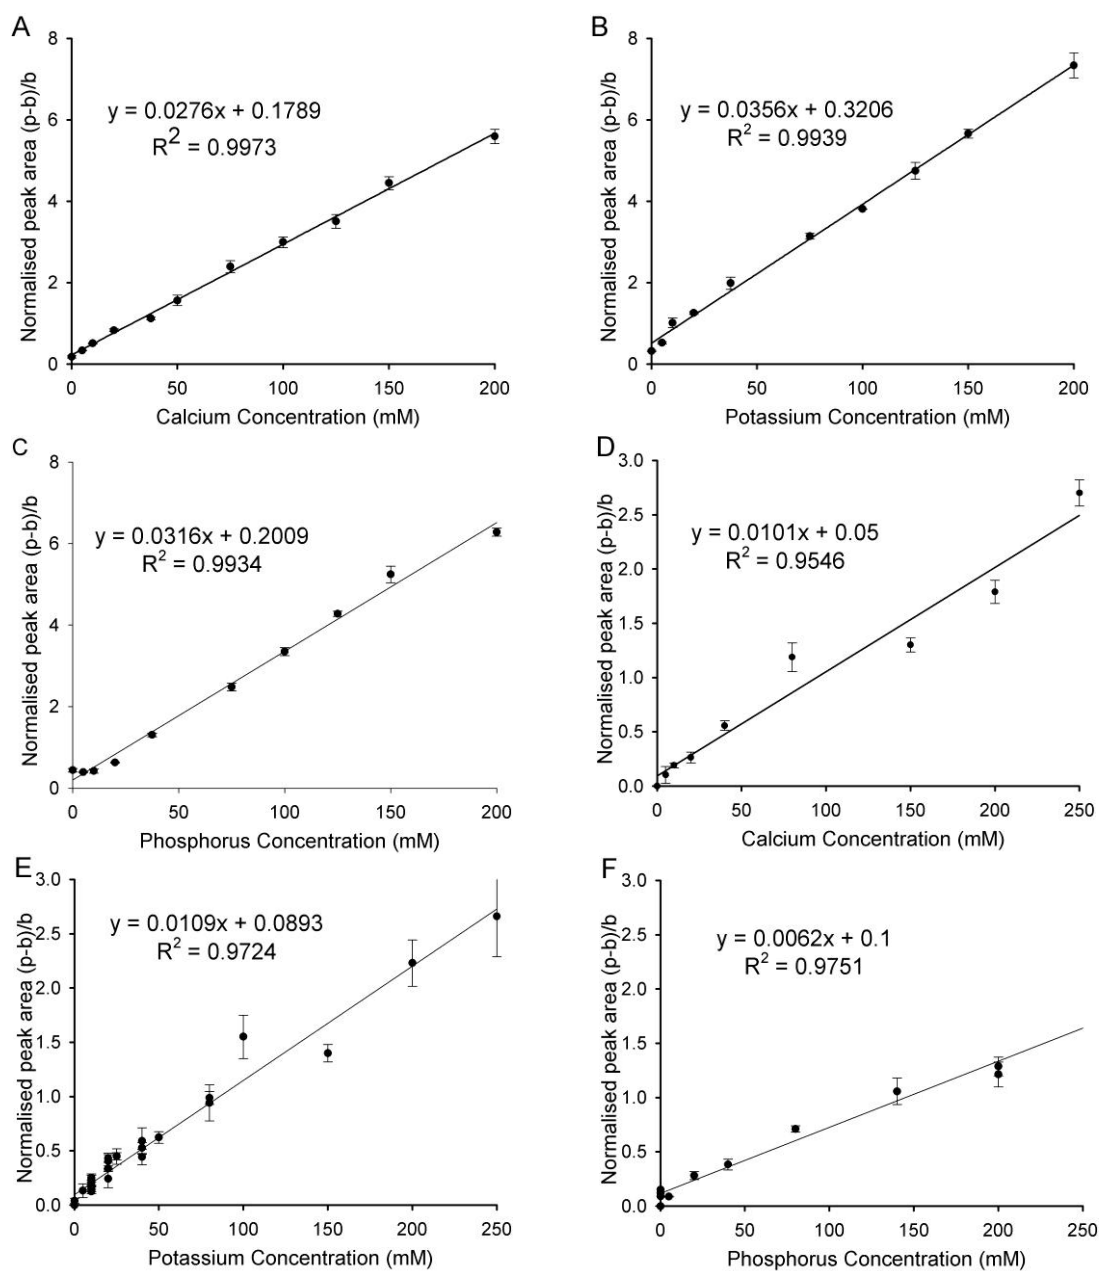

**Supplemental Figure 1.** Standard curves of (A,D) calcium, (B,E) potassium and (C,F) phosphorus using single cell sampling and analysis (SiCSA) (A,B,C) or cryo-SEM (D,E,F) in combination with X-ray microanalysis (XRMA). For A,B,C, equal volumes ( $\approx 20$  pl) of internal standard (250mM rubidium fluoride (RbF) in 250mM Mannitol) and a dilution series from 200-2.5 mM  $\text{CaCl}_2$ , KCl or  $\text{NaH}_2\text{PO}_4$  was spotted onto 1% (w/v) pioloform-coated copper SEM grids, respectively. To account for overlap of Ca peaks with the K  $\beta$ -peak, calcium dilution series was always done in the presence of 125 mM KCl. Each concentration was spotted in quintuplicate and grids were prepared and analysed as for other SiCSA samples. For D,E,F, dilution of the following calibration solutions (in mM) A, 200 KCl,  $\text{MgSO}_4$ ,  $\text{NaH}_2\text{PO}_4$ ; B, 250  $\text{KNO}_3$ ,  $\text{CaCl}_2$ ; C, 50  $\text{MgSO}_4$ , 800  $\text{KNO}_3$ , 200  $\text{NaH}_2\text{PO}_4$ , 200 KCl; D, 1000 NaCl, 200  $\text{KNO}_3$ , 200  $\text{Ca}(\text{NO}_3)_2$ , were mixed with 5% (w/v) colloidal graphite/carbon that had been ball-milled and passed through a 50 mm sieve (Treeby et al., 1987). Solutions were placed in a brass stub and prepared identically to plant material analysed by cryo-SEM. Data was analysed with XRMAplot and plotted to form standard curves for each element.

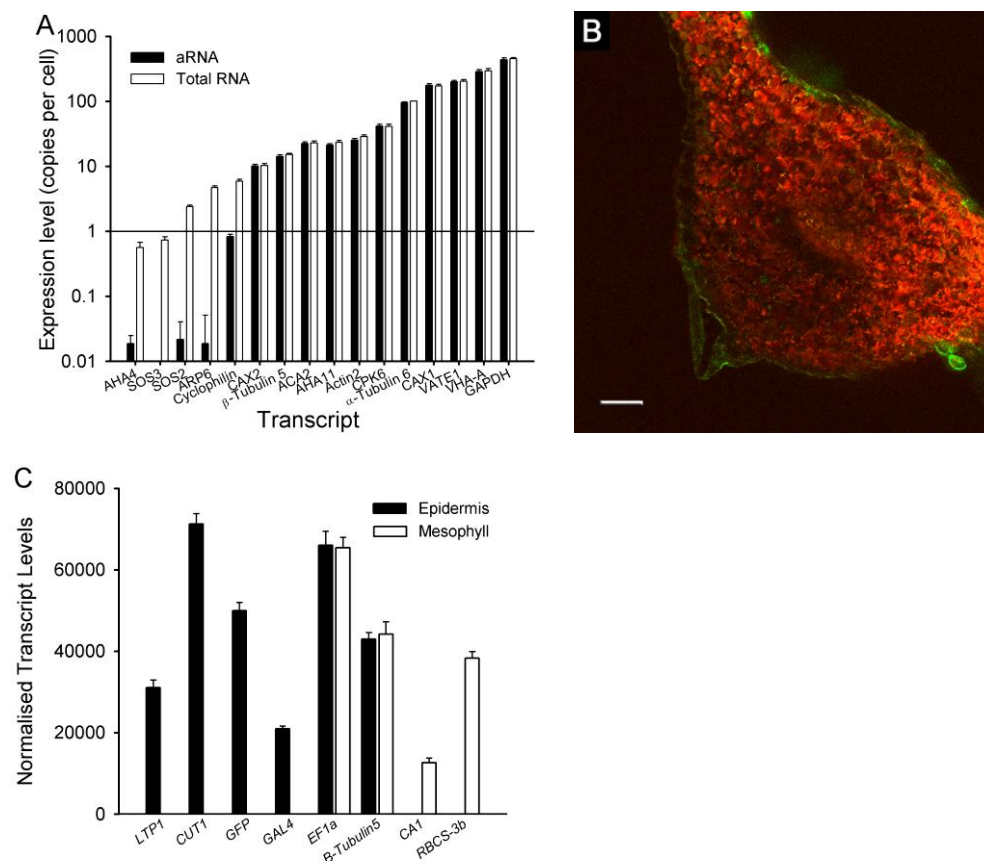

**Supplemental Figure 2.** Validation of SiCSA-based RNA sampling and amplification for qPCR and microarray study using the Arabidopsis enhancer trap line, KC464.

**A)** RNA amplification linearly amplifies transcripts with low (10 copies per cell equivalent [10 pg RNA]) to high abundance. DNase-treated leaf RNA from Col-0 was diluted to 10 pg/ $\mu$ l and 1  $\mu$ l was used as the template for two-rounds of RNA amplification (TargetAMP 2-round aRNA kit, Epicentre Biotechnologies), yielding over 1  $\mu$ g aRNA. cDNA was initiated from aRNA and the initial DNase-treated leaf RNA (Total RNA) with random hexamers using SuperScript<sup>®</sup> II (Invitrogen) as per manufacturers instructions. Data is presented as normalised transcript abundance of genes per cell (equivalent to 10 pg total RNA) for duplicate RNA amplifications, qPCR performed in triplicate as per methods.

**B)** Transgenic Arabidopsis, line KC464 (Col-0 background) has GAL4 and GFP expression specific to the epidermis and was used as the subject of microarray comparisons. Confocal fluorescence micrograph of propidium-iodide stained, Arabidopsis (line KC464) leaf cross-section showing GFP expression exclusively in the epidermis. Epidermal-specific expression of GFP was not observed to alter from germination to 8-weeks old as observed by fluorescence microscopy (data not shown). Scale bar = 100  $\mu$ m.

**C)** qPCR check of cell-specific gene expression and contamination of palisade mesophyll samples by RNA from adaxial epidermal cells. RNA was amplified from samples taken from 30 adaxial epidermal cells and 3 palisade mesophyll cell of leaf 8 of 6-week old KC464 plants. Data are normalised against *EF1a* (At1g07940),  *$\beta$ -Tubulin5* (At1g20010) and *Actin2* (At3g18780). Six independent amplifications were performed from 3 plants, with data presented as mean normalised expression levels  $\pm$  SEM (with three technical repeats for each biological sample). Cell-specific genes showed the expected pattern for epidermis, *CUT1*, *LTP1* and mesophyll *RBCS-3b*, *CA1* (Brandt et al., 2002; Inada and Wildermuth, 2005). GFP and GAL4 transcripts were also found only within the epidermal RNA samples as expected from GFP fluorescence profile. Equally amplified transcripts *EF1a* and  *$\beta$ -Tubulin5* were normalised against *Actin2*, known to be expressed in both cell types (Laval et al., 2002). Primers listed in Supplemental Table 2.

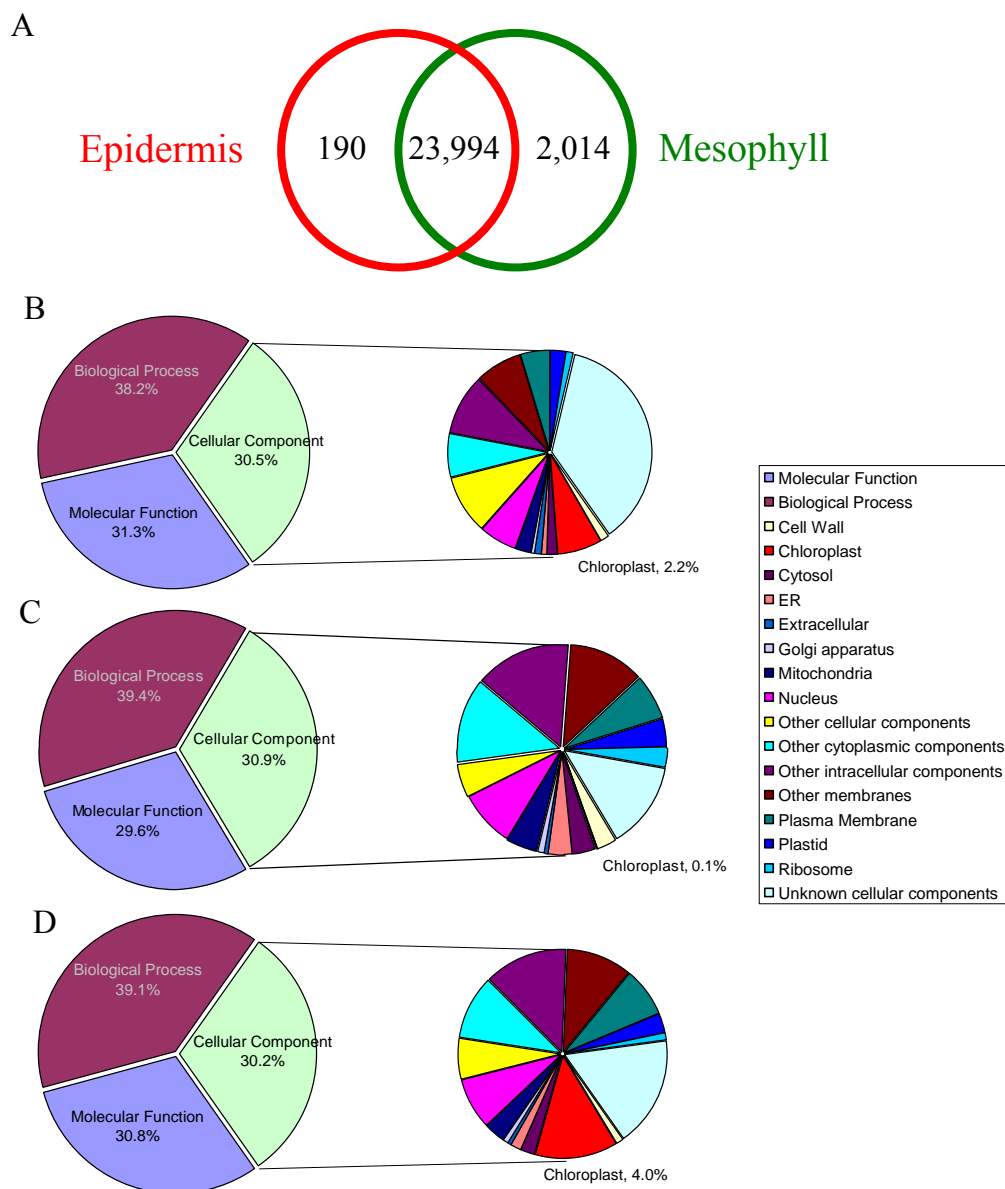

**Supplemental Figure 3.** Pie charts showing the presence of transcripts 4 sorted according to presence in each cell-type and ontologically within each template (TAIR GO annotation: <http://www.arabidopsis.org/tools/bulk/go/index.jsp>) utilising Agilent's "Feature Extraction Software" (V. 9.5.3.1, Agilent Technologies).

Expression cut-off applied according to criteria outlined in Materials and Methods. Transcripts detected are summarised in relation to: A) specific cell-type (23,994 total transcripts detected among both transcriptomes out of 33,239 distinct transcripts from array, 72%); gene ontology classification for B) whole 'Agilent Arabidopsis' transcriptome, C) adaxial epidermis transcriptome; D) palisade mesophyll transcriptome, showing enrichment of nuclear encoded, chloroplast-targeted sequences in mesophyll (D) and a much lower prevalence of these transcripts in epidermal samples (C).

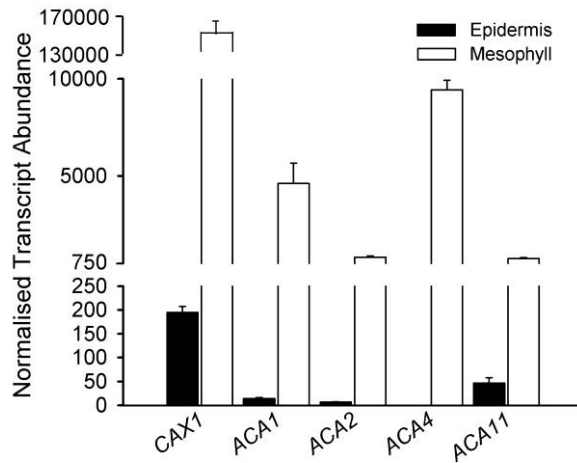

**Supplemental Figure 4.** Cell-specific transcript abundance of calcium transporters in laser microdissected epidermal and mesophyll leaf cells of Arabidopsis.

Laser microdissection of 5-week old Arabidopsis (Col-0) leaves was performed using Leica AS LMD microscope (Leica) to isolate epidermal (~800 cells) and mesophyll cells (~3000 cells) as per supplemental materials and methods using 3 transverse sections from 3 different plants. cDNA was synthesised from linearly amplified RNA from these populations, technical replication of qPCR was performed in triplicate, normalised with  *$\beta$ -tubulin* and *Actin2* as per materials and methods.

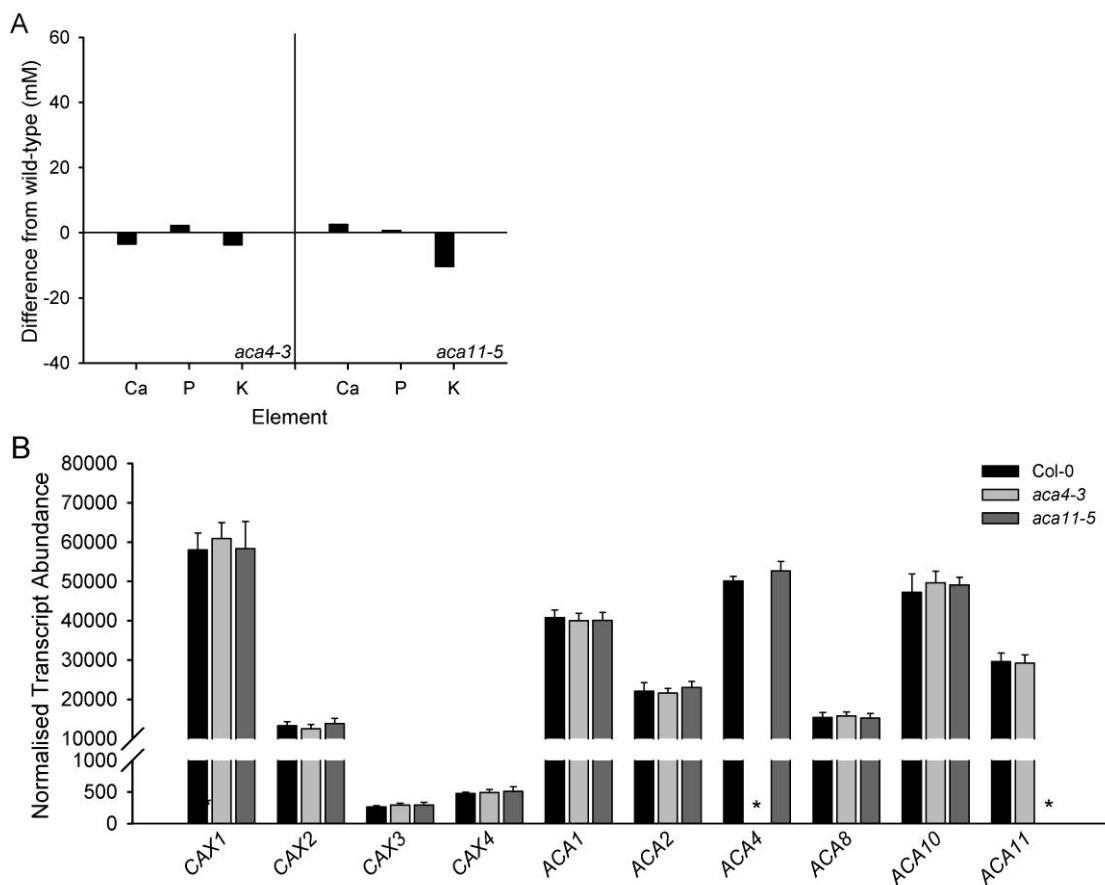

**Supplemental Figure 5.** Calcium accumulation and transcript abundance of selected  $\text{Ca}^{2+}$ -transporters within single T-DNA insertion lines of *CAX1*, *CAX3*, *ACA4* and *ACA11*.

**A)** Leaf elemental profiling by ICP-MS comparing T-DNA insertion lines of individual mesophyll-specific ACAs, *aca4-3* and *aca11-5* with wild-type Col-0. Data presented as mean concentration difference from wild-type Col-0 (n=6 individual plants).

**B)** qPCR for numerous  $\text{Ca}^{2+}$ -transporters on whole-rosette RNA from Col-0, *aca4-3* and *aca11-5* T-DNA insertion lines, normalised against *EF1 $\alpha$*  (At1g07940),  *$\beta$ -Tubulin5* (At1g20010) and *Actin2* (At3g18780). Mean + S.E.M, n=3 plants, qPCR performed in triplicate. Primers listed in Supplemental Table 2. Asterisk indicates absence of transcript.

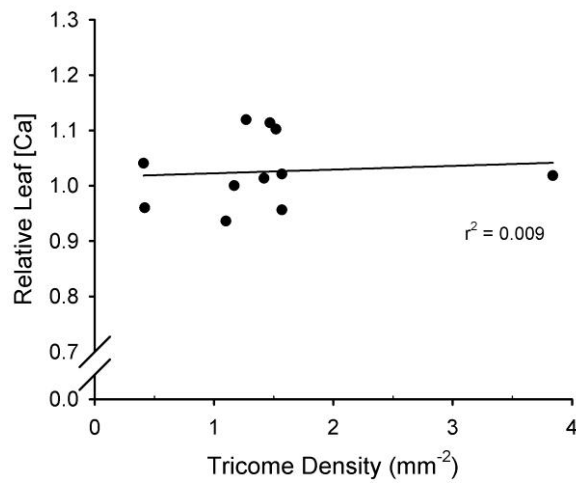

**Supplemental Figure 6.** Trichome density does not correlate with total Ca content of leaves in Arabidopsis. Correlation of leaf [Ca] from ICP-MS data obtained from PiiMS database ([www.ionomicshub.org](http://www.ionomicshub.org)) (Baxter et al., 2007) and normalised using REML according to Broadley et al. (2010) with published trichome density (Hauser et al., 2001) for 4-6 week old plants of 11 different ecotypes, a subset of the ecotypes used in Figure 2C.

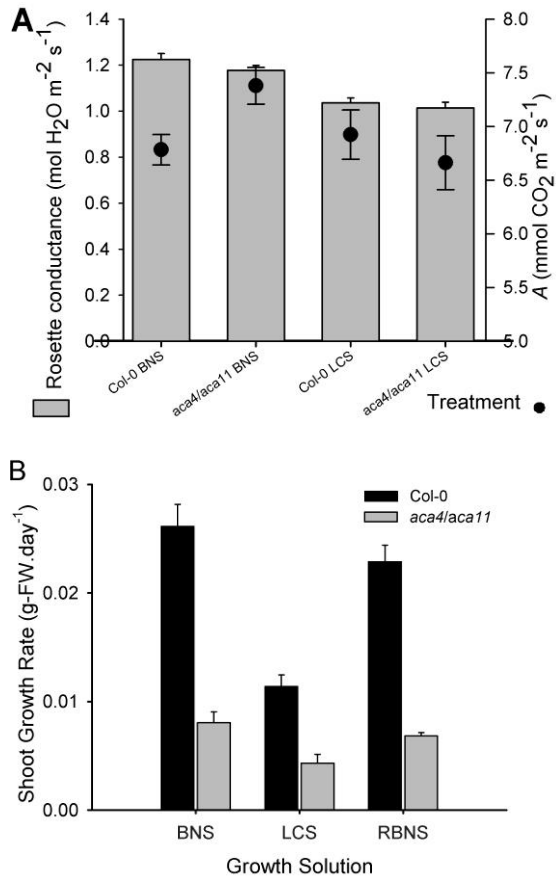

**Supplemental Figure 7.** Stomatal and growth phenotypes of *aca4/aca11* are not regulated by apoplastic [Ca]

**A)** Gas exchange measurements of Col-0 and *aca4/aca11* plants grown in BNS and LCS using Li-6400XT Arabidopsis whole plant chamber. Mean + S.E.M., n = 5 plants for each genotype per treatment.

**B)** Growth rates of Col-0 and *aca4/aca11* lines under different Ca regimes. Mean + S.E.M., n=5 plants for each genotype per condition.

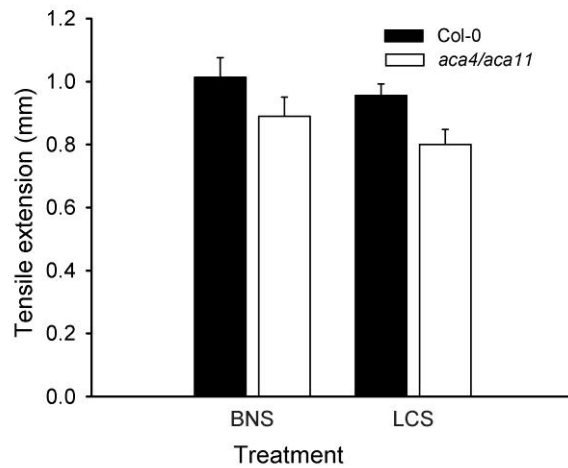

**Supplemental Figure 8.** Extensibility of Col-0 and *aca4/aca11* leaves are not more extensible in low apoplastic [Ca].

Tensile extension at maximum break for Col-0 (filled bars) and *aca4/aca11* (open bars) of leaves 7-11 from plants grown in BNS (Col-0, *aca4/aca11*) (n = 36 for each) and LCS (n = 36 for each) over 2 experimental runs. Mean + S.E.M., Students' t-test performed on each genotype in each condition and no significant difference found.



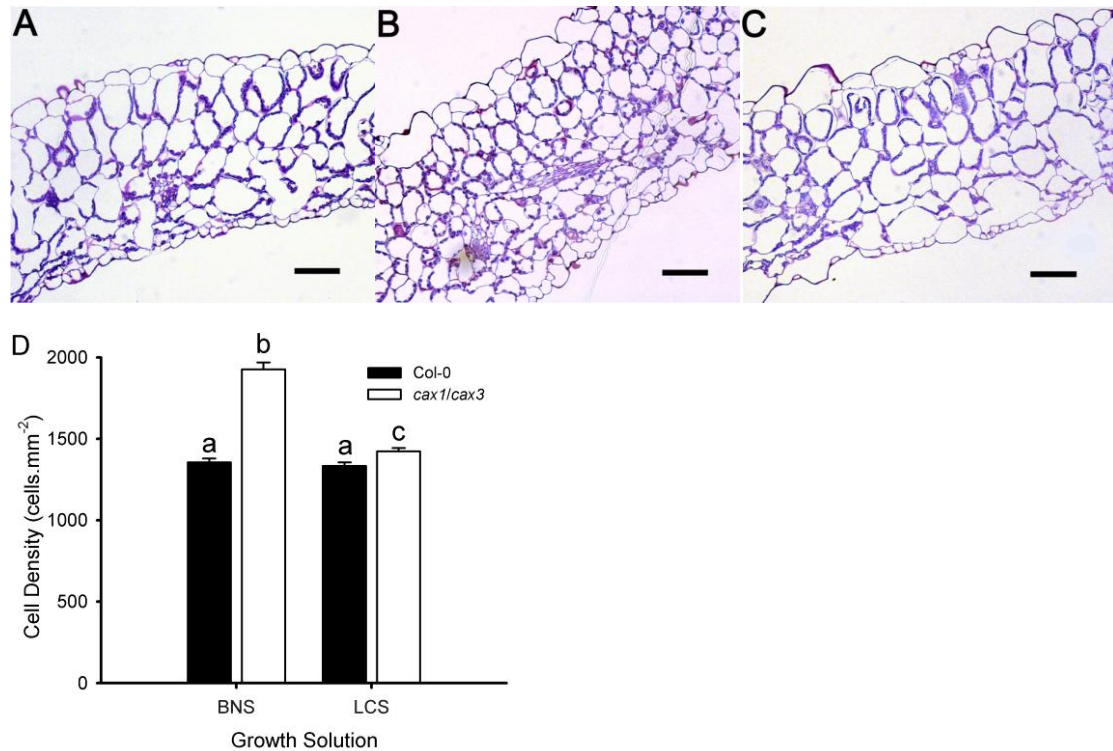

**Supplemental Figure 9.** Increase in cell density of *cax1/cax3* plants ameliorated by reducing apoplastic Ca. One micrometer transverse leaf cross-sections from Col-0 and *cax1/cax3* leaves embedded in LR white and post-stained in toluidine blue. Leaf number 8 of 6-week old, BNS-grown (A) Col-0, (B) *cax1/cax3*, and (C) LCS-grown *cax1/cax3* sections. 20x Magnification; Bar = 50 μm. D) Cell density (mesophyll cells per mm<sup>2</sup> leaf tissue) measured by light microscopy in these leaf sections (n = 18 leaf sections, consisting of 6 sections from 3 independent plant leaves for each genotype in each treatment). a,b,c represent groups that are not significantly different as determined by one-way ANOVA and Tukey's HSD posthoc test.

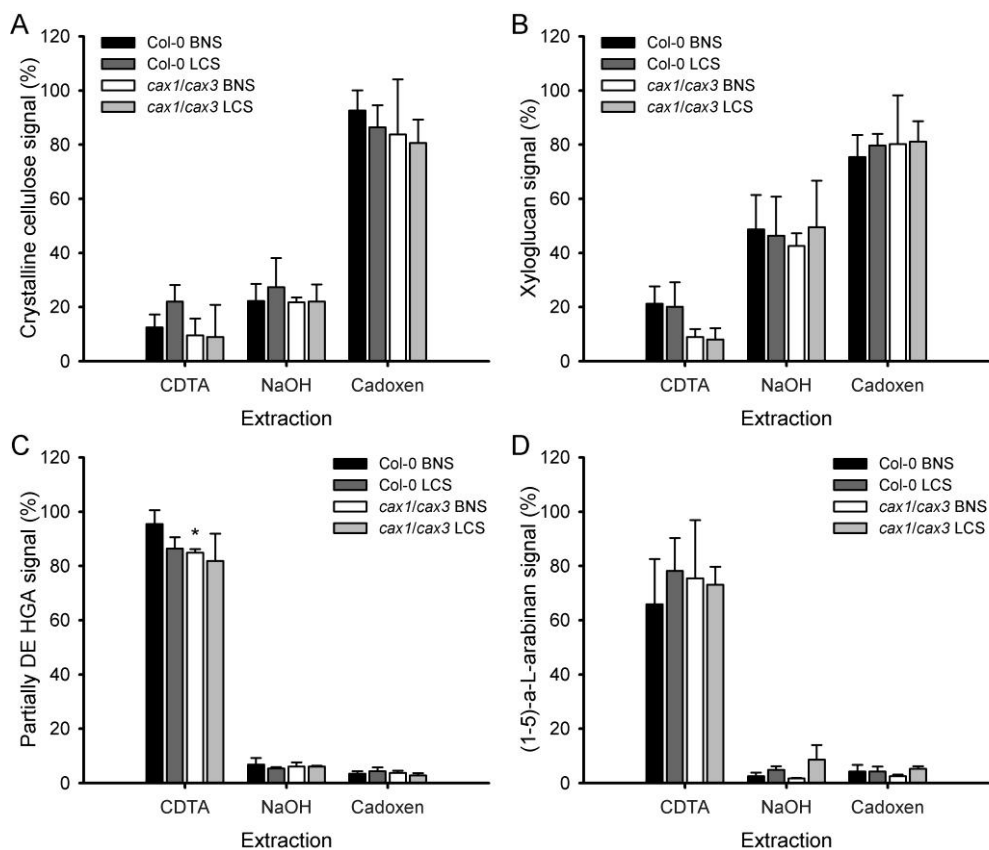

**Supplemental Figure 10.** Analysis of cell wall glycans from Col-0 and *cax1/cax3* plants grown under both BNS and LCS treatments by CoMPP assay (Moller et al., 2007).

Results of hybridisation with **(A)** CBM3a (for crystalline cellulose) and **(B)** LM15 antibody (for xyloglucan), and **(C)** JIM7 antibody (for partially methyl-esterified HGA), and **(D)** LM13 antibody (for linearised (1-5)-linked L-arabinan. Presented as signal intensity with the strongest signal given the value of 100%. Three biological replicate samples per genotype per condition, each comprised of material pooled from three independent plants, were analysed in triplicate. Three successive extractions performed on each sample CDTA (solubilises pectins), NaOH (solubilises non-cellulosic polysaccharides) and cadoxen (solubilises cellulose). Mean + S.E.M. Asterisk indicates significant differences from Col-0 BNS using one-way ANOVA and Tukeys HSD posthoc test.

**Supplemental Table 1:** Spatio-temporal accumulation patterns of [Ca], [P] and [K] in hydroponically-grown, Arabidopsis ecotype Col-0, enhancer trap transgenic line (KC464) and *aca4/aca11* and *cax1/cax3* (both BNS and LCS) T-DNA insertion lines as determined by ICP-MS (whole leaf) and SiCSA/XRMA (epidermis and mesophyll). Mean  $\pm$  SEM (n=6 independent plants for ICP; n=25 samples of each cell type from each line, 5 independent plants for SiCSA/XRMA).

| Element                   | 3.5 weeks       | 5 weeks         | 5 weeks (KC464) | 5 weeks ( <i>cax1/cax3</i> ) | 6 weeks ( <i>cax1/cax3</i> LCS) | 5 weeks ( <i>aca4/aca11</i> ) | 6.5 weeks       | 8 weeks         |
|---------------------------|-----------------|-----------------|-----------------|------------------------------|---------------------------------|-------------------------------|-----------------|-----------------|
| <i>Whole Leaf</i>         |                 |                 |                 |                              |                                 |                               |                 |                 |
| Ca                        | 50.2 $\pm$ 1.9  | 50.8 $\pm$ 2.0  | 50.6 $\pm$ 1.0  | 40.8 $\pm$ 1.5               | 20.3 $\pm$ 2.4                  | 54.6 $\pm$ 3.8                | 50.9 $\pm$ 3.4  | 52.2 $\pm$ 5.5  |
| P                         | 30.9 $\pm$ 0.4  | 28.9 $\pm$ 1.0  | 29.1 $\pm$ 1.1  | 44.6 $\pm$ 2.6               | 28.4 $\pm$ 2.4                  | 31.8 $\pm$ 1.9                | 29.2 $\pm$ 2.3  | 28.5 $\pm$ 1.6  |
| K                         | 135.0 $\pm$ 6.8 | 132.8 $\pm$ 4.4 | 131.5 $\pm$ 2.0 | 155.2 $\pm$ 4.8              | 188.2 $\pm$ 9.9                 | 124.2 $\pm$ 5.6               | 140 $\pm$ 9.4   | 143 $\pm$ 6.8   |
| <i>Adaxial Epidermis</i>  |                 |                 |                 |                              |                                 |                               |                 |                 |
| Ca                        | 3.96 $\pm$ 0.3  | 4.02 $\pm$ 0.7  | 4.00 $\pm$ 1.4  | 6.5 $\pm$ 1.6                | 5.4 $\pm$ 1.3                   | 4.1 $\pm$ 0.5                 | 4.02 $\pm$ 1.4  | 4.18 $\pm$ 1.3  |
| P                         | 62.4 $\pm$ 6.6  | 62.1 $\pm$ 4.9  | 61.7 $\pm$ 4.8  | 51.8 $\pm$ 5.4               | 53.2 $\pm$ 4.6                  | 62.8 $\pm$ 3.6                | 61.5 $\pm$ 5.4  | 61.1 $\pm$ 4.4  |
| K                         | 140.1 $\pm$ 2.1 | 145.7 $\pm$ 6.7 | 148.2 $\pm$ 5.1 | 123.5 $\pm$ 8.4              | 116.3 $\pm$ 4.5                 | 134.9 $\pm$ 6.8               | 144.1 $\pm$ 6.6 | 148.0 $\pm$ 6.9 |
| <i>Palisade Mesophyll</i> |                 |                 |                 |                              |                                 |                               |                 |                 |
| Ca                        | 58.3 $\pm$ 0.9  | 60.5 $\pm$ 2.7  | 60.0 $\pm$ 1.4  | 35.5 $\pm$ 1.1               | 20.3 $\pm$ 1.6                  | 61.5 $\pm$ 1.9                | 61.4 $\pm$ 4.3  | 62.5 $\pm$ 3.4  |
| P                         | 15.4 $\pm$ 3.2  | 17.6 $\pm$ 3.4  | 13.1 $\pm$ 4.8  | 19.4 $\pm$ 4.4               | 17.1 $\pm$ 2.5                  | 19.1 $\pm$ 1.1                | 14.5 $\pm$ 0.3  | 14.8 $\pm$ 4.2  |
| K                         | 121.4 $\pm$ 5.1 | 124.1 $\pm$ 8.8 | 125.6 $\pm$ 5.9 | 173.3 $\pm$ 10.0             | 198.1 $\pm$ 11.4                | 119.4 $\pm$ 3.5               | 122.3 $\pm$ 5.9 | 125.9 $\pm$ 6.1 |

**Supplemental Table 2:** Nested and quantitative PCR primer sequences used in this study. GSNP: gene-specific nested primer used in first round of nested PCR; qF: qPCR forward primer, qR: qPCR reverse primer. N: all 4 dNTPs. Annotated those primers used for normalisation in all qPCR experiments.

| Gene Name                                          | ATG Identifier | Primer Sequence (5' → 3')                                      |
|----------------------------------------------------|----------------|----------------------------------------------------------------|
| <b>Quantitative PCR primers</b>                    |                |                                                                |
| <b>RNA Amplification and Microarray Validation</b> |                |                                                                |
| <i>Actin2</i> (qPCR normalisation)                 | At3g18780      | qF: TGAGCAAAGAAATCACAGCACT<br>qR: CCTGGACCTGCCTCATCATA         |
| <i>AHA4</i>                                        | At3g47950      | qF: GAGACTCAAAGGACTCGACATAGA<br>qR: CATCACACAACAGAACAACA       |
| <i>AHA11</i>                                       | At5g62670      | qF: GCGGGAGCTTCACACTTA<br>qR: CTCTCTATGCTTCTCTCAGACGG          |
| <i>ARP6</i>                                        | At5g43500      | qF: GAGTTCTTCACGCGATACCTCCA<br>qR: GACCACCTTTATTAACCCCATTTACCA |
| <i>CA1</i>                                         | At3g01500      | qF: GTGAAAGGGAGGCGGTGAA<br>qR: ATCACAGTCAAAGGCACATTACAA        |
| <i>CPK6</i>                                        | At4g23650      | qF: CCGCATTCCAGTTCTTTGAC<br>qR: CTCTCACATTCTGCGTCGGT           |
| <i>CUT1</i>                                        | At1g68530      | qF: CATTACGCAGGAGGCAGAG<br>qR: CCACACGGCAGAGTTACTTGTG          |
| <i>Cyclophilin</i>                                 | At2g36130      | qF: TGGCGAACGCTGGTCCTAATACA<br>qR: CAAAACTCCTCTGCCCAATCAA      |
| <i>EF-1α</i> (qPCR normalisation)                  | At1g07940      | qF: GACAGGCGTTCTGGTAAGGAG<br>qR: GCGGAAAGAGTTTTGATGTTCA        |
| <i>GAPDH-A</i> (qPCR normalisation)                | At3g26650      | qF: TGGTTGATCTCGTTGTGCAGGTCTC<br>qR: GTCAGCCAAGTCAACAACCTCTCTG |
| <i>LTP1</i>                                        | At2g38450      | qF: ATAGCCAAGACGACCCAGAA<br>qR: TAGCTCATCACCTCACGGTTT          |
| <i>RBCS-3b</i>                                     | At5g38410      | qF: TGAATACCTTCTCCGCAACAA<br>qR: GCATTCTTCAACTTCCCTTCAACAC     |
| <i>SOS2</i>                                        | At5g35410      | qF: GACCCCAATCCCAAAACAC<br>qR: CGCTACATAACTGCCCTCAA            |
| <i>SOS3</i>                                        | At5g24270      | qF: TGAAGTAATGGTGGATAA<br>qR: TCACAAGATGAAACGAAAC              |
| <i>VATE1</i>                                       | At4g11150      | qF: TGCTCTGGAGGTGTTGTGTTAG<br>qR: CGGATCACTGGGAGTTTCATA        |
| <i>VHA-A</i>                                       | At1g78900      | qF: CCAGCAGAAGGGGAGGATAC<br>qR: CCGATAAATAAAATACCGACCAC        |
| <i>α-Tubulin 6</i>                                 | At1g50010      | qF: ATGTGGGTCAGGGTATGGAA<br>qR: CCGACAACCTTCTTAGTCTCCTCT       |
| <i>β-Tubulin 5</i> (qPCR normalisation)            | At1g20010      | qF: CGTCAAATCCAGCGTTTGTGA<br>qR: TCGTCCATTCTTCTCCTGTG          |
| <i>GAL4</i>                                        | N/A            | qF: CGGAGGAGAGCAGCAACAAG<br>qR: ATTCCAAGGGCATCGGTAAC           |
| <i>mGFP5</i>                                       | N/A            | qF: TGTCTTTTACCAGACAACCATTA<br>qR: AGCTGTTACAACTCAAGAAGGA      |
| <b>Calcium Transporters</b>                        |                |                                                                |
| <i>CAX1</i>                                        | At2g38170      | qF: CATCATCGTGGCGTGGATT<br>qR: GCATTTTGTCTTCTGGGGAAGT          |
| <i>CAX2</i>                                        | At3g13320      | qF: TTCCATGTTTGCAGTCCC<br>qR: CCCTTTTATGCTTCACACCAGA           |
| <i>CAX3</i>                                        | At3g51860      | qF: ACTGGTTCTATTGTTATGCTATGTCA<br>qR: CAAGCTCCCTCCCTCATTC      |

|                                                                  |           |                                                              |
|------------------------------------------------------------------|-----------|--------------------------------------------------------------|
| <i>CAX4</i>                                                      | At5g01490 | qF: TTGTCCATTCTTGTTACTTCCTTAG<br>qR: GTATTGGTTTCGGTTGAGGG    |
| <i>ACA1</i>                                                      | At1g27770 | qF: CTGGGTACATTTGCGGATAC<br>qR: CTTAGTGTGAACCAACAGGGAT       |
| <i>ACA2</i>                                                      | At4g37640 | qF: AAGGGAAGGCTATGTTTGGTCT<br>qR: TGTGTTATTGTGAGTGGTGTGTTGTG |
| <i>ACA4</i>                                                      | At2g41560 | qF: TTGGGTAATGACTGTGACGG<br>qR: CGGTATCAGGCAGAGTTGG          |
| <i>ACA8</i>                                                      | At5g57110 | qF: TCGTAAACCAGATGAGAAGAACA<br>qR: ACCGATGCCAACACAGATAAG     |
| <i>ACA10</i>                                                     | At4g29900 | qF: TCGTCTGTATCGGAATCGG<br>qR: CAAGTACCACTAAAAGCCACCT        |
| <i>ACA11</i>                                                     | At3g57330 | qF: AGTTGGGTGTTTGTGCTGT<br>qR: CGTTGCGTTACTAGATGGTGG         |
| <b>Cell-wall modifying genes</b>                                 |           |                                                              |
| <i>XTH19</i>                                                     | At4g30290 | qF: GCTACAAGGGGAGGATTAGAGA<br>qR: ACTTTCCATTAACCCATACACAT    |
| <i>XTH22</i>                                                     | At5g57560 | qF: GCTTCTTACCGTGGCTTTC<br>qR: CCTCTGCACCCATCTCATC           |
| <i>HTX23/AtXTR6</i>                                              | At4g25810 | qF: AAGAACCAGCCAATGAGAATG<br>qR: TGAGACAACCACGAACCAGTA       |
| Pectinesterase<br>( <i>PMEPCRB</i> )                             | At4g02330 | qF: ACTTTCAACTCCGCCACTTT<br>qR: CCTGGTGCTTCTCTGGTCC          |
| Pectinesterase<br>( <i>PMEPCRD</i> )                             | At2g43050 | qF: GGTTCGGTCTCAAATCTCTG<br>qR: CGTCAATAAAACTCGCCACA         |
| Expansin ( <i>EXPA5</i> )                                        | At3g29030 | qF: GCAACTCTTATCTCAATGGTC<br>qR: CTCCGGTGTAGGTCTGG           |
| Expansin ( <i>EXPA16</i> )                                       | At3g55500 | qF: GTAGGAAGAGTGGAGGGATAAG<br>qR: GACCAACGAGAACAGCATTAG      |
| Cellulose synthase<br>catalytic subunit<br>( <i>CESA3/Cev1</i> ) | At5g05170 | qF: ACACTTCTGATTCCGCCAAC<br>qR: CCTAACCCACAACAACGAGA         |
| Cellulose synthase<br>catalytic subunit ( <i>CESA8</i> )         | At4g18780 | qF: CGGAGTTGTTGCTGGATTCT<br>qR: AAGTCGTATCGGTTTTGGAGA        |
| Cellulose synthase-like<br>protein ( <i>CsA1</i> )               | At4g16590 | qF: AGAGTAAACGAATGGGTTGTGA<br>qR: GAAGGTTCTTAGGTTCCGACA      |
| Pectinmethylesterase<br>( <i>PME1</i> )                          | At2g26440 | qF: GACCGTGGGAAGCCATACTC<br>qR: GTGAAGTTGTAGACCGTGAAGTT      |
| Pectinmethylesterase<br>( <i>PME2</i> )                          | At3g10720 | qF: GGTGGGGAAGCACTTGATAC<br>qR: GTGATAAACTCTGTTGCCGTG        |
| Pectinmethylesterase<br>( <i>PME3</i> )                          | At3g49220 | qF: AGCATCCGATCTCCAAGC<br>qR: CCAGGTCCACTGTTCAAATACT         |
| Polygalacturonase<br>( <i>PGA3</i> )                             | At3g07820 | qF: TCAAGGACGTTAGCAACCC<br>qR: TGAGCAATGGAAAGTGCC            |

**Supplemental Table 3.** Expression of calcium ATPase (ECA/ACA) and Cation/H<sup>+</sup>-antiporters (CAX/CCX) gene family from adaxial epidermis versus palisade mesophyll SiCSA microarray of leaf 8 from Arabidopsis line KC464. Data indicates mean intensity from microarray (see methods and main figure legends for more details). Transcripts with significantly greater differential expression between cell types highlighted (P < 0.05) as determined by One way ANOVA and Tukey's HSD posthoc test. Epi, epidermis; Mes, mesophyll.

| Gene Family/Name                                | AGI       | Epi    | Mes    |
|-------------------------------------------------|-----------|--------|--------|
| <b>P-type ATPases</b>                           |           |        |        |
| ECA1                                            | At1g07810 | 63.3   | 67.4   |
| ECA2                                            | At4g00900 | 39.5   | 22.1   |
| ECA3/ACA6                                       | At1g10130 | 235.5  | 171.2  |
| ECA4                                            | At1g07670 | 16.7   | 26.0   |
| ACA1                                            | At1g27770 | 80.5   | 6965.4 |
| ACA2                                            | At4g37640 | 43.5   | 1907.0 |
| ACA4                                            | At2g41560 | 487.3  | 2044.2 |
| ACA7                                            | At2g22950 | 25.4   | 8.3    |
| ACA8                                            | At5g57110 | 33.2   | 82.0   |
| ACA9                                            | At3g21180 | 68.8   | 65.0   |
| ACA10                                           | At4g29900 | 12.5   | 61.8   |
| ACA11                                           | At3g57330 | 2.3    | 354.7  |
| ACA12                                           | At3g63380 | 31.8   | 25.8   |
| ACA13                                           | At3g22910 | 16.6   | 24.3   |
| <b>Ca<sup>2+</sup>/H<sup>+</sup> exchangers</b> |           |        |        |
| CAX1                                            | At2g38170 | 14.8   | 6363.6 |
| CAX2                                            | At3g13320 | 2.2    | 38.7   |
| CAX3                                            | At3g51860 | 28.4   | 27.5   |
| CAX4                                            | At5g01490 | 9.4    | 8.9    |
| CAX5                                            | At1g55730 | 37.6   | 17.2   |
| CAX7/CCX1                                       | At5g17860 | 10.0   | 14.0   |
| CAX8/CCX2                                       | At5g17850 | 86.4   | 78.2   |
| CAX9/CCX3                                       | At3g14070 | 8.0    | 1.7    |
| CAX10/CCX4                                      | At1g54110 | 21.3   | 5.7    |
| CAX11/CCX5                                      | At1g08960 | 4019.6 | 3985.6 |

**Supplemental Table 4.** Expression of potassium transporters gene families from adaxial epidermis versus palisade mesophyll SiCSA microarray of leaf 8 from Arabidopsis line KC464. Data indicates mean intensity from microarray (see methods and main figure legends for more details). Transcripts with significantly greater differential expression between cell types highlighted ( $P < 0.05$ ) as determined by One way ANOVA and Tukey's HSD posthoc test. Epi, epidermis; Mes, mesophyll.

| <b>Gene Family/Name</b>                                      | <b>AGI</b> | <b>Epi</b> | <b>Mes</b> |
|--------------------------------------------------------------|------------|------------|------------|
| <b>KCO (2P/4TM) K<sup>+</sup> channels</b>                   |            |            |            |
| KCO1/TPK1                                                    | At5g55630  | 19.0       | 107.2      |
| KCO2/TPK2                                                    | At5g46370  | 21.7       | 12.8       |
| KCO3                                                         | At5g46360  | 46.1       | 40.1       |
| KCO4/TPK4                                                    | At1g02510  | 41.0       | 31.0       |
| KCO5/TPK5                                                    | At4g01840  | 1354.7     | 1288.3     |
| KCO6/TPK3                                                    | At4g18160  | 11.5       | 12.6       |
| <b>Shaker-type (1 P/6TM) K<sup>+</sup> channels</b>          |            |            |            |
| GORK                                                         | At5g37500  | 1.1        | 3.1        |
| SKOR                                                         | At3g02850  | 15.7       | 16.7       |
| AKT1                                                         | At2g26650  | 26.1       | 20.6       |
| AKT2/AKT3                                                    | At4g22200  | 1002.6     | 1126.5     |
| AKT4/KAT3                                                    | At4g32650  | 49.8       | 41.3       |
| AKT5                                                         | At4g32500  | 350.1      | 266.4      |
| AKT6/SPIK                                                    | At2g25600  | 74.5       | 63.1       |
| KAT1                                                         | At5g46240  | 51.6       | 46.7       |
| KAT2                                                         | At4g18290  | 25.4       | 17.6       |
| <b>K<sup>+</sup> Channel Tetramerisation Domain Proteins</b> |            |            |            |
| KCTD1                                                        | At2g24240  | 287.8      | 208.2      |
| KCTD2                                                        | At3g09030  | 98.4       | 95.2       |
| KCTD3                                                        | At4g30940  | 245.8      | 174.9      |
| KCTD4                                                        | At5g41330  | 40.5       | 29.3       |
| <b>K<sup>+</sup>/H<sup>+</sup> antiporter homologs</b>       |            |            |            |
| KEA1                                                         | At1g01790  | 720        | 5639.3     |
| KEA2                                                         | At4g00630  | 354.9      | 576.1      |
| KEA3                                                         | At4g04850  | 203.0      | 353.4      |
| KEA4                                                         | At2g19600  | 16.1       | 26.4       |
| KEA5                                                         | At5g51710  | 82.2       | 52.1       |
| KEA6                                                         | At5g11800  | 28.7       | 120.5      |
| <b>KUP/HAK/KT K<sup>+</sup> transporters</b>                 |            |            |            |
| KUP1/KT1                                                     | At2g30070  | 140.1      | 285.2      |
| KUP2/KT2                                                     | At2g40540  | 84.5       | 70.1       |
| KUP3                                                         | At3g02050  | 15.5       | 109        |
| KUP5                                                         | At4g33530  | 75.4       | 20.4       |
| KUP6                                                         | At1g70300  | 4.4        | 41.8       |
| KUP7                                                         | At5g09400  | 41.0       | 45.5       |
| KUP8                                                         | At5g14880  | 171.3      | 198.0      |
| KUP9                                                         | At4g19960  | 34.1       | 72.0       |
| KUP10                                                        | At1g31120  | 52.6       | 253.6      |
| KUP11                                                        | At2g35060  | 595.0      | 705.6      |
| KUP12                                                        | At1g60160  | 5.9        | 29.0       |
| TRH1                                                         | At4g23640  | 28.9       | 22.9       |
| HAK5                                                         | At4g13420  | 42.9       | 46.2       |

**Supplemental Table 5.** Expression of inorganic phosphate transporter (PHT and PHO) gene families from adaxial epidermis versus palisade mesophyll SiCSA microarray of leaf 8 from Arabidopsis line KC464. Data indicates mean intensity from SiCSA microarray (see methods and main figure legends for more details). Transcripts with significantly greater differential expression between cell types highlighted ( $P < 0.05$ ) as determined by One way ANOVA and Tukey's HSD posthoc test. Epi, epidermis; Mes, mesophyll.

| Gene Family/Name              | AGI       | Epi    | Mes    |
|-------------------------------|-----------|--------|--------|
| <b>Phosphate Transporters</b> |           |        |        |
| Pht1                          | At5g43350 | 29.0   | 28.7   |
| Pht2                          | At5g43370 | 20.4   | 25.4   |
| Pht2.1                        | At3g26570 | 87825  | 84277  |
| Pht3                          | At5g43360 | 45.5   | 47.5   |
| Pht3.1                        | At5g14040 | 696.4  | 839.6  |
| Pht3.2                        | At3g48850 | 46.0   | 39.6   |
| Pht4/Pht1.4                   | At2g38940 | 9.8    | 9.2    |
| Pht4.1                        | At2g29650 | 22265  | 22085  |
| Pht4.2                        | At2g38060 | 17.7   | 4.1    |
| Pht4.3                        | At3g46980 | 2.5    | 17.5   |
| Pht4.4                        | At4g00370 | 45.1   | 2077.0 |
| Pht4.5                        | At5g20380 | 1110.8 | 1231.8 |
| Pht4.6                        | At5g44370 | 98.2   | 43.9   |
| Pht5                          | At2g32830 | 22.5   | 23.1   |
| Pht6                          | At5g43340 | 2.8    | 3.5    |
| Pht7/PHT1.7                   | At3g54700 | 72.5   | 50.0   |
| Pht8/Pht1.8                   | At1g20860 | 28.6   | 35.7   |
| Pht9/Pht1.9                   | At1g76430 | 16.5   | 7.9    |
| <b>Phosphate Homeostasis</b>  |           |        |        |
| PHO1                          | At3g23430 | 43.6   | 41.2   |
| PHO1-H1                       | At1g68740 | 15.7   | 8.9    |
| PHO1-H2                       | At2g03260 | 56.8   | 127.3  |
| PHO1-H3                       | At1g14040 | 47.9   | 72.4   |
| PHO1-H4                       | At4g25350 | 38.9   | 27.1   |
| PHO1-H5                       | At2g03240 | 634.9  | 910.7  |
| PHO1-H6                       | At2g03250 | 15.9   | 40.8   |
| PHO1-H7                       | At1g26730 | 38.6   | 16.3   |
| PHO1-H8                       | At1g35350 | 7.6    | 4180.3 |
| PHO1-H9                       | At3g29060 | 4.0    | 11.3   |
| PHO1-H10                      | At1g69480 | 14.8   | 34.4   |



**Supplemental Table 6.** Transcripts belonging to some major categories of proteins involved in cell wall modification using gene ontology annotations from ATH1 annotation file (<https://www.affymetrix.com/support/technical/annotationfilesmain.affx>) and cross referenced with genes expressed in leaves 6-8 of Arabidopsis ([http://www.weigelworld.org/resources/microarray/AtGenExpress/AtGE\\_dev\\_samples.pdf/view](http://www.weigelworld.org/resources/microarray/AtGenExpress/AtGE_dev_samples.pdf/view)). Cell wall categories sorted according to CaZY database (<http://www.cazy.org>) (Cantarel et al., 2009) and for the XTH family (Rose et al., 2002). Data shown as log<sub>2</sub> normalised pixel intensity of Col-0 subtracted by *cax1/cax3*. Transcripts in bold are those analysed by qPCR in this study. Those highlighted red have significantly lower expression in the *cax1/cax3* mutant, while those in green have higher expression in Col-0 (P<0.05), as determined with an empirical Bayes' t-test (Smyth, 2004) using false discovery rate for multiple testing correction (Benjamini and Hochberg, 1995).

| Gene Name                                                                 | AGI              | Diff.        | P-value     |
|---------------------------------------------------------------------------|------------------|--------------|-------------|
| <b>Expansins (Family A)</b>                                               |                  |              |             |
| <b>EXPA16</b>                                                             | <b>At3g55500</b> | <b>-1.1</b>  | <b>0.01</b> |
| <b>EXPA5</b>                                                              | <b>At3g29030</b> | <b>-1.03</b> | <b>0</b>    |
| EXPA10                                                                    | At1g26770        | -0.62        | 0.17        |
| EXPA11                                                                    | At1g20190        | -0.55        | 0.21        |
| <b>EXPA13</b>                                                             | <b>At3g03220</b> | <b>-0.46</b> | <b>0.03</b> |
| EXPA4                                                                     | At2g39700        | -0.35        | 0.33        |
| EXPA3                                                                     | At2g37640        | -0.28        | 0.35        |
| EXPA8                                                                     | At2g40610        | -0.21        | 0.77        |
| EXPA6                                                                     | At2g28950        | -0.11        | 0.64        |
| EXPA1                                                                     | At1g69530        | 0.56         | 0.21        |
| <b>Glycoside Hydrolase Family 28 (Polygalacturonases)</b>                 |                  |              |             |
| <b>PGA3</b>                                                               | <b>At3g07820</b> | <b>-3.18</b> | <b>0.00</b> |
|                                                                           | At1g80170        | -1.22        | 0.01        |
|                                                                           | At1g60590        | -1.04        | 0.01        |
|                                                                           | At1g19170        | -1           | 0           |
|                                                                           | At3g62110        | -0.72        | 0           |
|                                                                           | <b>At1g23460</b> | <b>-0.52</b> | <b>0.01</b> |
|                                                                           | At3g16850        | -0.36        | 0.09        |
|                                                                           | At4g23820        | -0.24        | 0.1         |
|                                                                           | At3g57790        | -0.02        | 0.94        |
|                                                                           | At5g41870        | -0.02        | 0.94        |
|                                                                           | At3g06770        | 0.13         | 0.42        |
| <b>Glycoside Hydrolase Family 16 (XTH)</b>                                |                  |              |             |
| XTH30/XTR4                                                                | At1g32170        | -0.9         | 0.3         |
| <b>XTH8</b>                                                               | <b>At1g11545</b> | <b>-0.81</b> | <b>0.01</b> |
| XTH4/EXGT-A1                                                              | At2g06850        | -0.71        | 0.08        |
| <b>XTH32</b>                                                              | <b>At2g36870</b> | <b>-0.69</b> | <b>0.01</b> |
| XTH7                                                                      | At4g37800        | -0.56        | 0.21        |
| XTH6                                                                      | At5g65730        | -0.3         | 0.39        |
| XTH25/XTR3                                                                | At5g57550        | -0.3         | 0.55        |
| XTH18                                                                     | At4g30280        | -0.14        | 0.83        |
| XTH16                                                                     | At3g23730        | 0.01         | 0.99        |
| XTH33                                                                     | At1g10550        | 0.14         | 0.49        |
| XTH9                                                                      | At4g03210        | 0.15         | 0.44        |
| XTH27/EXGT-A3                                                             | At2g01850        | 0.91         | 0.1         |
| <b>XTH23/XTR6</b>                                                         | <b>At4g25810</b> | <b>1.54</b>  | <b>0</b>    |
| <b>XTH19</b>                                                              | <b>At4g30290</b> | <b>1.77</b>  | <b>0.07</b> |
| <b>XTH22/TCH4</b>                                                         | <b>At5g57560</b> | <b>1.94</b>  | <b>0.03</b> |
| <b>Glycosyltransferase Family 2 Cellulose Synthase Catalytic Subunit)</b> |                  |              |             |

|                                                                |                  |              |             |
|----------------------------------------------------------------|------------------|--------------|-------------|
| <b>CESA4/IRX5</b>                                              | <b>At5g44030</b> | <b>-2.04</b> | <b>0</b>    |
| <b>CESA8/IRX1</b>                                              | <b>At4g18780</b> | <b>-2.01</b> | <b>0</b>    |
| <b>CESA2</b>                                                   | <b>At4g39350</b> | <b>-0.71</b> | <b>0.01</b> |
| CESA5                                                          | At5g09870        | -0.6         | 0.1         |
| <b>CESA3/CEV1</b>                                              | <b>At5g05170</b> | <b>-0.39</b> | <b>0.01</b> |
| CESA6                                                          | At5g64740        | -0.33        | 0.26        |
| CESA1                                                          | At4g32410        | -0.32        | 0.18        |
| <b>Glycosyltransferase Family 2 (Cellulose Synthase Like)</b>  |                  |              |             |
| <b>CsIA1</b>                                                   | <b>At4g16590</b> | <b>-3.58</b> | <b>0.00</b> |
| <b>CsIC5</b>                                                   | <b>At4g31590</b> | <b>-0.8</b>  | <b>0.02</b> |
| CsIA11                                                         | At5g16190        | -0.6         | 0.10        |
| CsID5                                                          | At1g02730        | -0.15        | 0.60        |
| CsID3                                                          | At3g03050        | -0.09        | 0.71        |
| CsIE1                                                          | At1g55850        | -0.02        | 0.98        |
| CsIB2                                                          | At2g32540        | 0.06         | 0.93        |
| <b>CsID2</b>                                                   | <b>At5g16910</b> | <b>0.56</b>  | <b>0.00</b> |
| <b>Carbohydrate Esterase Family 8 (Pectin Methylesterases)</b> |                  |              |             |
| <b>PMEPCRD</b>                                                 | <b>At2g43050</b> | <b>-1.71</b> | <b>0.00</b> |
|                                                                | At3g59010        | -1.69        | 0.00        |
| <b>PME3</b>                                                    | <b>At3g49220</b> | <b>-0.65</b> | <b>0.00</b> |
|                                                                | At5g53370        | -0.56        | 0.11        |
|                                                                | At1g05310        | -0.47        | 0.08        |
|                                                                | At1g53840        | -0.35        | 0.06        |
|                                                                | At5g64640        | -0.31        | 0.23        |
|                                                                | At4g33220        | -0.28        | 0.12        |
|                                                                | At3g14310        | -0.27        | 0.37        |
|                                                                | At5g09760        | -0.24        | 0.31        |
|                                                                | At5g47500        | 0.19         | 0.25        |
|                                                                | At3g29090        | 0.42         | 0.07        |
|                                                                | At3g43270        | 0.46         | 0.10        |
| <b>PME2</b>                                                    | <b>At3g10720</b> | <b>0.48</b>  | <b>0.07</b> |
| <b>PME1</b>                                                    | <b>At2g26440</b> | <b>0.7</b>   | <b>0.23</b> |
| <b>PMEPCRB</b>                                                 | <b>At4g02330</b> | <b>1.65</b>  | <b>0.01</b> |
| <b>Carbohydrate Esterase Family 13 (Pectin Acetylerases)</b>   |                  |              |             |
|                                                                | At2g46930        | -0.59        | 0.01        |
|                                                                | At5g26665        | -0.56        | 0.04        |
|                                                                | At3g62060        | -0.51        | 0.03        |
|                                                                | At5g23870        | -0.49        | 0.01        |
|                                                                | At3g09420        | -0.27        | 0.16        |
|                                                                | At5g45280        | -0.25        | 0.56        |
|                                                                | At3g05910        | 0            | 1.02        |
|                                                                | At3g09410        | 0.01         | 0.98        |
|                                                                | At4g19410        | 0.15         | 0.24        |
|                                                                | At4g19420        | 0.58         | 0.41        |
| <b>Polysaccharide Lyase Family 1 (Putative Pectate Lyase)</b>  |                  |              |             |
|                                                                | At3g01270        | -2.32        | 0.00        |
|                                                                | At5g55720        | -1.10        | 0.00        |
|                                                                | At5g15110        | -1.09        | 0.01        |
|                                                                | At4g13710        | -0.94        | 0.00        |
|                                                                | At4g24780        | -0.72        | 0.00        |
|                                                                | At1g14420        | -0.62        | 0.03        |
|                                                                | At1g04680        | -0.55        | 0.04        |
|                                                                | At3g07010        | -0.52        | 0.14        |
|                                                                | At4g13210        | -0.52        | 0.01        |
|                                                                | At3g55140        | -0.43        | 0.14        |
|                                                                | At1g67750        | -0.41        | 0.02        |

|           |       |      |
|-----------|-------|------|
| At3g09540 | -0.39 | 0.32 |
| At3g53190 | -0.12 | 0.54 |
| At5g04310 | -0.07 | 0.80 |
| At3g24230 | -0.03 | 0.89 |
| At5g48900 | 0.07  | 0.92 |
| At5g63180 | 0.13  | 0.64 |
| At3g24670 | 0.24  | 0.22 |
| At3g54920 | 0.27  | 0.29 |
| At3g27400 | 0.46  | 0.52 |

**Supplemental Table 7.** Normalised transcript abundance of cell wall-related genes in leaves of BNS-grown Col-0 and *cax1/cax3* leaves and LCS-grown *cax1/cax3* leaves as determined by qPCR analysis. Normalised against *GAPDH-A*,  $\beta$ -*Tubulin 5* and *EF1 $\alpha$*  (refer to methods). Data used to calculate relative abundance of cell wall-related transcripts for *cax1/cax3* BNS- and LCS-grown leaves (Figure 4C).

| Gene Name      | AGI       | Col-0<br>BNS | S.E.M. | <i>cax1/cax3</i><br>BNS | S.E.M. | <i>cax1/cax3</i><br>LCS | S.E.M. |
|----------------|-----------|--------------|--------|-------------------------|--------|-------------------------|--------|
| <i>PMEPCRB</i> | At4g02330 | 4784.2       | 267.9  | 27041.4                 | 1874.5 | 10096.1                 | 1005.2 |
| <i>PME1</i>    | At3g49220 | 7839.4       | 574.3  | 20445.5                 | 1417.2 | 2355.8                  | 114.5  |
| <i>PME2</i>    | At3g10720 | 5930.4       | 373.6  | 9963.3                  | 690.6  | 4119.5                  | 200.3  |
| <i>PME3</i>    | At2g26440 | 1528.0       | 19.8   | 302.6                   | 20.9   | 350.2                   | 17.0   |
| <i>PMEPCRD</i> | At2g43050 | 120.4        | 5.9    | 13.0                    | 0.9    | 102.7                   | 4.9    |
| <i>CESA3</i>   | At5g05170 | 9503.2       | 428.5  | 4762.0                  | 330.1  | 17980.1                 | 874.3  |
| <i>CESA8</i>   | At4g18780 | 284.0        | 15.1   | 100.3                   | 6.9    | 364.8                   | 17.7   |
| <i>CsIA1</i>   | At4g16590 | 584.4        | 31.2   | 163.9                   | 11.3   | 1610.5                  | 78.3   |
| <i>EXPA5</i>   | At3g29030 | 2023.4       | 228.3  | 711.2                   | 49.3   | 2556.6                  | 124.3  |
| <i>EXPA16</i>  | At3g55500 | 402.0        | 9.7    | 145.3                   | 10.0   | 509.6                   | 24.7   |
| <i>XTH19</i>   | At4g30290 | 241.5        | 47.8   | 11326.4                 | 785.1  | 4174.3                  | 202.9  |
| <i>XTH22</i>   | At5g57560 | 4836.2       | 166.9  | 60436.6                 | 4189.4 | 48516.9                 | 2359.3 |
| <i>XTH23</i>   | At4g25810 | 950.0        | 50.7   | 12448.3                 | 862.9  | 12839.2                 | 624.3  |
| <i>PGA3</i>    | At3g07820 | 151.0        | 3.7    | 39.1                    | 2.7    | 427.4                   | 20.7   |
| <i>BFRUCT1</i> | At3g13790 | 555.7        | 29.7   | 660.8                   | 45.8   | 636.2                   | 30.9   |

### Supplemental Reference List (not featured in main article)

- Cantarel, B., Coutinho, P., Rancurel, C., Bernard, T., Lombard, V., and Henrissat, B.** (2009). The Carbohydrate-Active EnZymes database (CAZy): an expert resource for Glycogenomics. *Nucl. Acids Res.* **37**: D233-238.
- Hauser, M.T., Harr, B., and Schlotterer, C.** (2001) Trichome distribution in *Arabidopsis thaliana* and its close relative *Arabidopsis lyrata*: Molecular analysis of the candidate gene *GLABROUS1*. *Mol. Biol. Evol.* **18**: 1754-1763.
- Laval, V., Koroleva, O.A., Murphy, E., Lu, C.G., Milner, J.J., Hooks, M.A., and Tomos, A.D.** (2002). Distribution of actin gene isoforms in the *Arabidopsis* leaf measured in microsamples from intact individual cells. *Planta* **215**: 287-292.
- Rose, J.K., Braam, J., Fry, S.C., and Nishitani, K.** (2002). The XTH family of enzymes involved in xyloglucan endotransglucosylation and endohydrolysis: current perspectives and a new unifying nomenclature. *Plant Cell Physiol* **43**: 1421 - 1435.
- Treeby, M.T., Vansteveninck, R.F.M., and Devries, H.M.** (1987). Quantitative estimates of phosphorus concentrations within *Lupinus Luteus* leaflets by means of electron-probe X-ray-microanalysis. *Plant Physiol.* **85**: 331-334.
